# Supplementary material for: Study of the Spatio-Chemical Heterogeneity of Tannin-Furanic Foams: From 1D FTIR Spectroscopy to 3D FTIR Micro-Computed Tomography
Source: MDPI journal article supplement (doi:10.3390/ijms222312869), 2021-11-28
Supplement: s1 [file s1]

## Supplementary Materials

### Study of the spatio-chemical heterogeneity of tannin-furanic foams: from 1D FTIR spectroscopy to 3D FTIR micro-computed tomography.

Nicola Cefarin<sup>1,2‡</sup>, Diana E. Bedolla<sup>1,3‡</sup>, Artur Surowka<sup>1,4‡</sup>, Sandro Donato<sup>5,6‡</sup>, Thomas Sepperer<sup>7,8</sup>, Gianluca Tondi<sup>7,9</sup>, Diego Dreossi<sup>1</sup>, Nicola Sodini<sup>1</sup>, Giovanni Birarda<sup>1,\*</sup> and Lisa Vaccari<sup>1</sup>

1 Elettra-Sincrotrone Trieste, S.S. 14 Km 163.5, 34149 Basovizza, Trieste, Italy

2 IOM-CNR, Trieste, S.S. 14 Km 163.5, 34149 Basovizza, Trieste, Italy

3 Area Science Park, Padriciano 99, 34149 Trieste, Italy

4 AGH University of Science and Technology, al. Mickiewicza 30, 30-059, Kraków, Poland

5 University of Calabria, Department of Physics, Via P.Bucci 31C, 87036, Rende (CS), Italy

6 Istituto Nazionale di Fisica Nucleare, Division of Frascati, Via Fermi, 54, 00044 Frascati, Rome, Italy

7 Salzburg University of Applied Sciences, Forest products technology & Timber constructions dept., Marktstrasse 136a, 5431, Kuchl, Austria

8 Salzburg Center for Smart Materials, Jakob-Haringerstrasse 2a, Salzburg 5020, Austria

9 University of Padua, Department of Land, Environment, Agriculture & Forestry, Viale dell'Università 16, 35020, Legnaro (PD), Italy

\*Correspondence: [giovanni.birarda@elettra.eu](mailto:giovanni.birarda@elettra.eu);

**Figure S1.** Tannin-furanic rigid foam.

**Figure S2.** FTIR- $\mu$ CT setup.

**Movie Clip 1.mp4.** FTIR- $\mu$ CT setup in operation.

**Movie Clip 2.mp4.** Nylon loop through the visible and IR camera (FPA).

**Virtual sectioning of the tomographic samples:** Video Reference\_merged.mp4: tannin-furanic foam; Video Acid\_High\_merged.mpa4: Acid-High formulation; Video Acid\_Low\_merged.mp4: Acid-Low formulation; Video FOH\_High\_merged: FOH-High formulation; Video FOH\_Low\_merged: FOH-Low formulation.

**Figure S1. Tannin-furanic rigid foam.**

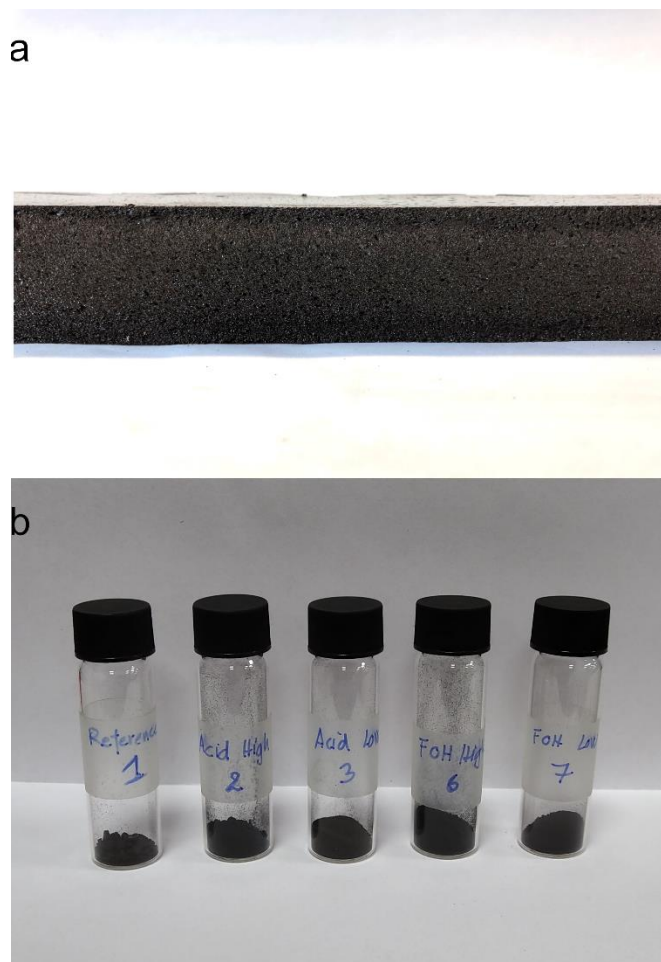

**Figure S1** a) Tannin-furanic rigid foam, Reference formulation b) Crushed powders of the five formulations as used for FTIR-ATR, FTIR imaging and FTIR- $\mu$ CT: 1: Reference, 2: Acid High, 3: Acid Low, 6: FOH High, 7: FOH Low.

**Figure S2.** FTIR  $\mu$ -CT setup

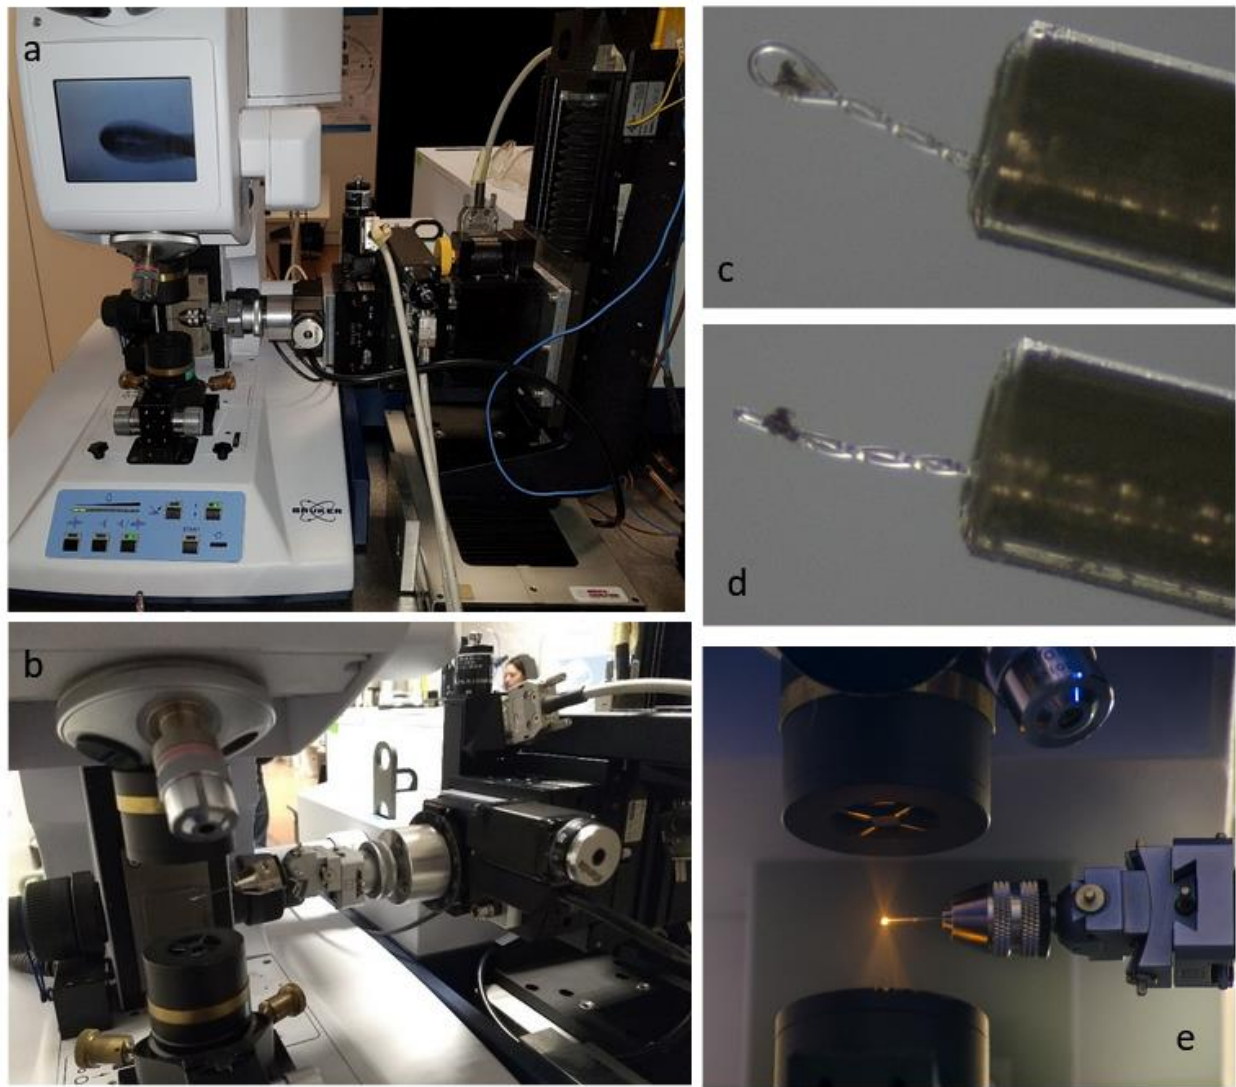

**Figure S2** (a,b) The tomography setup has been assembled using the following components: three independent Mdrive (M), Corvus (C) and Standa (S) motors, covering 6 degrees of freedom, enabled sample rotation (S), translation up/down (M1), translation inside-outside the Field of View - FOV (manual), pitch (C), roll (C) and drag (C) movements in the FTIR- $\mu$ CT setup. Motor control and data acquisition procedures were integrated and automatized by a dedicated software written in LabVIEW 2017 utilizing USB (S) and TCP/IP (M and C) connection protocols. The software enabled full synchronization of sample rotation with the ongoing data acquisition with the OPUS 7.5 software.
