# Supplementary material for: Study of the Spatio-Chemical Heterogeneity of Tannin-Furanic Foams: From 1D FTIR Spectroscopy to 3D FTIR Micro-Computed Tomography
Source: Int J Mol Sci. 2021 Nov 28;22(23):12869. doi: 10.3390/ijms222312869 (PMC8658003; doi:10.3390/ijms222312869)
Supplement: Supplementary file 1 [file ijms-22-12869-s001.zip]

Archive with 8 entries (8 files):
- Acid_High_merged.mp4
- Acid_Low_merged.mp4
- FOH_High_merged.mp4
- FOH_Low_merged.mp4
- Movie Clip 1.mp4
- Movie Clip 2.mp4
- Reference_merged.mp4
- Supporting Information_MDPI_Revised.pdf
